# Supplementary material for: Cancer incidence and mortality in China, 2016
Source: PubMed Central journal article supplement (PMC11256658; doi:10.1016/j.jncc.2022.02.002), 2022-02-27
Supplement: mmc1.pdf [file mmc1.pdf]

## Supplementary materials

### Cancer incidence and mortality in China, 2016

Rongshou Zheng, Siwei Zhang, Hongmei Zeng, Shaoming Wang, Kexin Sun, Ru Chen, Li Li, Wenqiang Wei, Jie He

#### Supplementary Table 1

Comparison of the estimated cancer incidence in China in 2016 with Globocan.

| ICD10  | Sites         | China estimate 2016 |                           |                    | GLOBOCAN2018 |                           |                    | GLOBOCAN2020 |                           |                    |
|--------|---------------|---------------------|---------------------------|--------------------|--------------|---------------------------|--------------------|--------------|---------------------------|--------------------|
|        |               | Cases               | Crude rate<br>(1/100 000) | ASR<br>(1/100 000) | Cases        | Crude rate<br>(1/100 000) | ASR<br>(1/100 000) | Cases        | Crude rate<br>(1/100 000) | ASR<br>(1/100 000) |
| ALL    | All sites     | 4064000             | 293.91                    | 186.46             | 4285033      | 301.10                    | 201.70             | 4568754      | 317.42                    | 206.35             |
| C11    | Nasopharynx   | 52000               | 3.76                      | 2.51               | 60558        | 4.30                      | 3.00               | 62444        | 4.34                      | 3.01               |
| C15    | Esophagus     | 252500              | 18.26                     | 11.13              | 307359       | 21.60                     | 13.90              | 324422       | 22.54                     | 13.92              |
| C16    | Stomach       | 396500              | 28.68                     | 17.59              | 456124       | 32.10                     | 20.70              | 478508       | 33.25                     | 20.74              |
| C18-21 | Colorectum    | 408000              | 29.51                     | 18.05              | 521490       | 36.60                     | 23.70              | 555477       | 38.59                     | 24.07              |
| C22    | Liver         | 388800              | 28.12                     | 17.65              | 392868       | 27.60                     | 18.30              | 410038       | 28.49                     | 18.35              |
| C25    | Pancreas      | 100400              | 7.26                      | 4.36               | 116291       | 8.20                      | 5.20               | 124994       | 8.68                      | 5.30               |
| C32    | Larynx        | 25700               | 1.86                      | 1.17               | 27832        | 2.00                      | 1.30               | 29135        | 2.02                      | 1.27               |
| C33-34 | Lung          | 828100              | 59.89                     | 36.46              | 774323       | 54.40                     | 35.10              | 815563       | 56.66                     | 35.08              |
| C50    | Female breast | 306000              | 45.37                     | 29.05              | 367900       | 53.30                     | 36.10              | 416371       | 59.39                     | 39.38              |
| C53    | Cervix        | 119300              | 17.69                     | 11.34              | 106430       | 15.40                     | 10.70              | 109741       | 15.65                     | 10.78              |
| C56    | Ovary         | 57200               | 8.47                      | 5.59               | 52971        | 7.70                      | 5.30               | 55342        | 7.89                      | 5.35               |
| C61    | Prostate      | 78300               | 11.05                     | 6.72               | 99322        | 13.60                     | 9.10               | 115426       | 15.64                     | 10.34              |
| C67    | Bladder       | 82300               | 5.95                      | 3.53               | 82270        | 5.80                      | 3.70               | 85694        | 5.95                      | 3.67               |

---

|        |            |        |       |       |        |       |       |        |       |       |
|--------|------------|--------|-------|-------|--------|-------|-------|--------|-------|-------|
| C70-72 | Brain, CNS | 109000 | 7.88  | 5.57  | 76494  | 5.40  | 4.10  | 79575  | 5.53  | 4.08  |
| C73    | Thyroid    | 202600 | 14.65 | 10.37 | 194232 | 13.60 | 10.10 | 221093 | 15.36 | 11.41 |
| C91-95 | Leukemia   | 85800  | 6.21  | 5.1   | 82607  | 5.80  | 5.10  | 85404  | 5.93  | 5.15  |

---

Abbreviations: ASR, age-standardized rate; CNS, central nervous system; ICD10, International Statistical Classification of Diseases 10<sup>th</sup> Revision.

**Supplementary Table 2**

Comparison of the estimated cancer mortality in China in 2016 with Globocan.

| ICD10  | Sites         | China estimate 2016 |                           |                    | GLOBOCAN2018 |                           |                    | GLOBOCAN2020 |                           |                    |
|--------|---------------|---------------------|---------------------------|--------------------|--------------|---------------------------|--------------------|--------------|---------------------------|--------------------|
|        |               | Deaths              | Crude rate<br>(1/100 000) | ASR<br>(1/100 000) | Deaths       | Crude rate<br>(1/100 000) | ASR<br>(1/100 000) | Deaths       | Crude rate<br>(1/100 000) | ASR<br>(1/100 000) |
| ALL    | All sites     | 2413500             | 174.55                    | 105.19             | 2865174      | 201.30                    | 130.10             | 3002899      | 208.63                    | 130.47             |
| C11    | Nasopharynx   | 26700               | 1.93                      | 1.24               | 31413        | 2.20                      | 1.50               | 34810        | 2.42                      | 1.59               |
| C15    | Esophagus     | 193900              | 14.02                     | 8.28               | 283433       | 19.90                     | 12.70              | 301135       | 20.92                     | 12.78              |
| C16    | Stomach       | 288500              | 20.87                     | 12.3               | 390182       | 27.40                     | 17.50              | 373789       | 25.97                     | 15.99              |
| C18-21 | Colon-rectum  | 195600              | 14.14                     | 8.13               | 247563       | 17.40                     | 10.90              | 286162       | 19.88                     | 12.07              |
| C22    | Liver         | 336400              | 24.33                     | 15.07              | 368960       | 25.90                     | 17.10              | 391152       | 27.18                     | 17.38              |
| C25    | Pancreas      | 87900               | 6.35                      | 3.75               | 110390       | 7.80                      | 4.90               | 121853       | 8.47                      | 5.15               |
| C32    | Larynx        | 14300               | 1.03                      | 0.61               | 15698        | 1.10                      | 0.70               | 15814        | 1.10                      | 0.68               |
| C33-34 | Lung          | 657000              | 47.51                     | 28.09              | 690567       | 48.50                     | 30.90              | 714699       | 49.66                     | 30.49              |
| C50    | Female breast | 71700               | 10.62                     | 6.39               | 97972        | 14.20                     | 8.80               | 117174       | 16.71                     | 10.03              |
| C53    | Cervix        | 37200               | 5.52                      | 3.36               | 47739        | 6.90                      | 4.40               | 59060        | 8.42                      | 5.31               |
| C56    | Ovary         | 27200               | 4.04                      | 2.45               | 30886        | 4.50                      | 2.90               | 37519        | 5.35                      | 3.33               |
| C61    | Prostate      | 33600               | 4.75                      | 2.73               | 51895        | 7.10                      | 4.70               | 51094        | 6.92                      | 4.69               |
| C67    | Bladder       | 33700               | 2.44                      | 1.31               | 38208        | 2.70                      | 1.60               | 39393        | 2.74                      | 1.62               |
| C70-72 | Brain, CNS    | 58500               | 4.23                      | 2.91               | 63860        | 4.50                      | 3.20               | 65204        | 4.53                      | 3.18               |
| C73    | Thyroid       | 8300                | 0.6                       | 0.37               | 8603         | 0.60                      | 0.39               | 9261         | 0.64                      | 0.40               |
| C91-95 | Leukemia      | 55700               | 4.03                      | 2.98               | 65531        | 4.60                      | 3.50               | 61694        | 4.29                      | 3.28               |

Abbreviations: ASR, age-standardized rate; CNS, central nervous system; ICD10, International Statistical Classification of Diseases 10<sup>th</sup> Revision.
